# Supplementary material for: Polyacrylamide-based hydrogel electrolyte for modulating water activity in aqueous hybrid batteries
Source: Royal Society of Chemistry journal article supplement (doi:10.1039/d4ra07551j), 2024-01-01
Supplement: d4ra07551j1.pdf [file d4ra07551j1.pdf]

Supplementary Information (SI) for RSC Advances.  
This journal is © The Royal Society of Chemistry 2024

## Supporting Information for

### **Polyacrylamide-Based Hydrogel Electrolyte for Modulating Water Activity in Aqueous Hybrid Batteries**

*Damira Rakhman<sup>1</sup>, Dauren Batyrbekuly<sup>1</sup>, Bauyrzhan Myrzakhmetov<sup>1,4</sup>, Karina Zhumagali<sup>1,3</sup>, Kuralay Issabek<sup>2</sup>, Orazaly Sultan-Akhmetov<sup>1,2</sup>, Nurzhan Umirov<sup>1,4</sup>, Aishuak Konarov<sup>1,2</sup> and Zhumabay Bakenov<sup>1,2,4</sup>*

*<sup>1</sup>National Laboratory Astana, Nazarbayev University, Astana, Kazakhstan*

*<sup>2</sup>Department of Chemical and Materials Engineering, School of Engineering and Digital Sciences, Nazarbayev University, Astana, Kazakhstan*

*<sup>3</sup>Petroleum Engineering, School of Mining and Geosciences, Nazarbayev University, Astana, Kazakhstan*

*<sup>4</sup>Institute of Batteries, LLP, Astana, Kazakhstan*

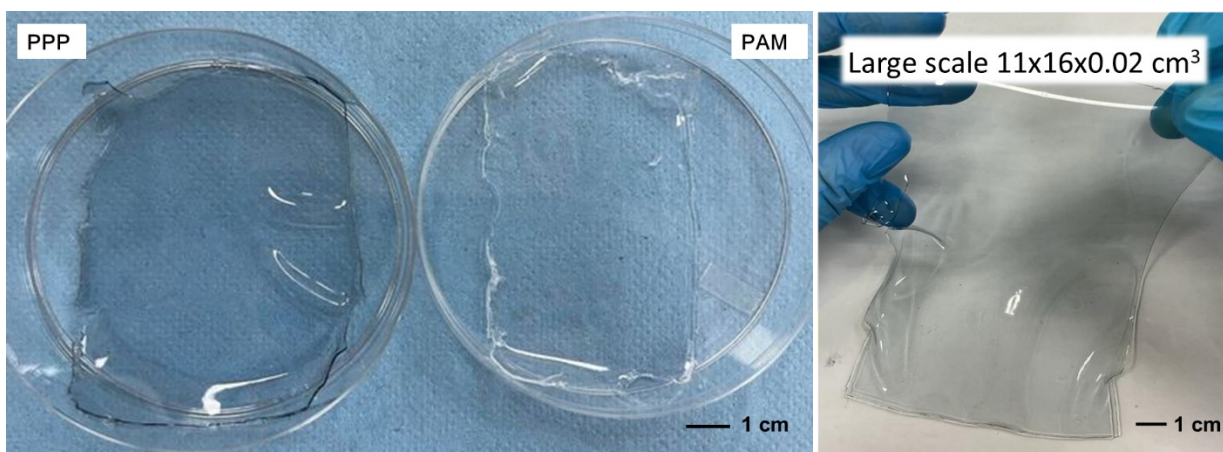

**Figure S1.** Photos of prepared PPP, comparison PAM hydrogels and a large-scale PPP hydrogel.

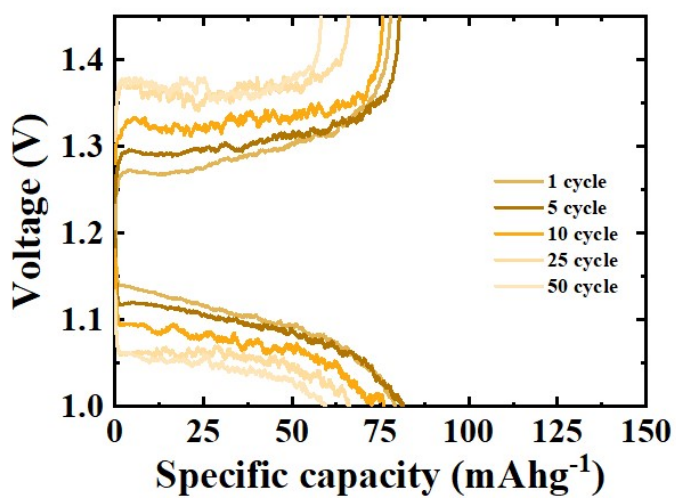

**Figure S2.** The charge-discharge curve of the aqueous electrolyte-based pouch cell.
